# Supplementary material for: Polyborosilazanes with Controllable B/N Ratio for Si–B–C–N Ceramics
Source: MDPI journal article supplement (doi:10.3390/ma16031053), 2023-01-25
Supplement: s1 [file s1]

## 1. Characterization of the monomer CB

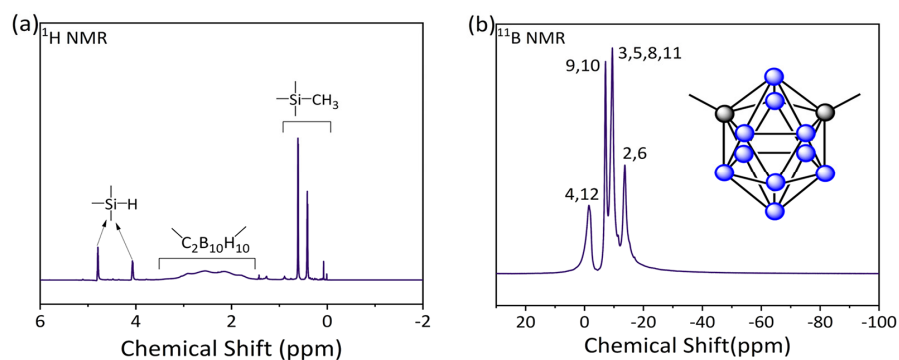

Figure S1. (a)  $^1\text{H}$  NMR, and (b)  $^{11}\text{B}$  NMR recorded for monomer CB.

## 2. Structural evolution of the polymer-derived ceramics

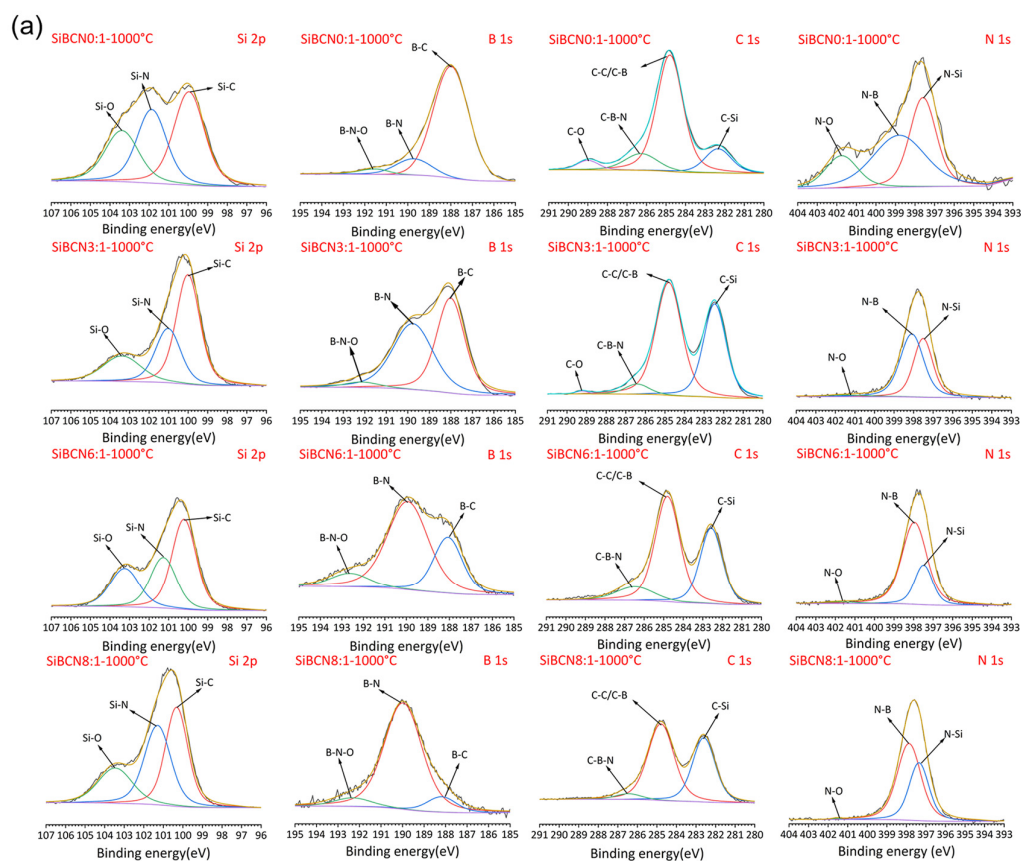

(b)

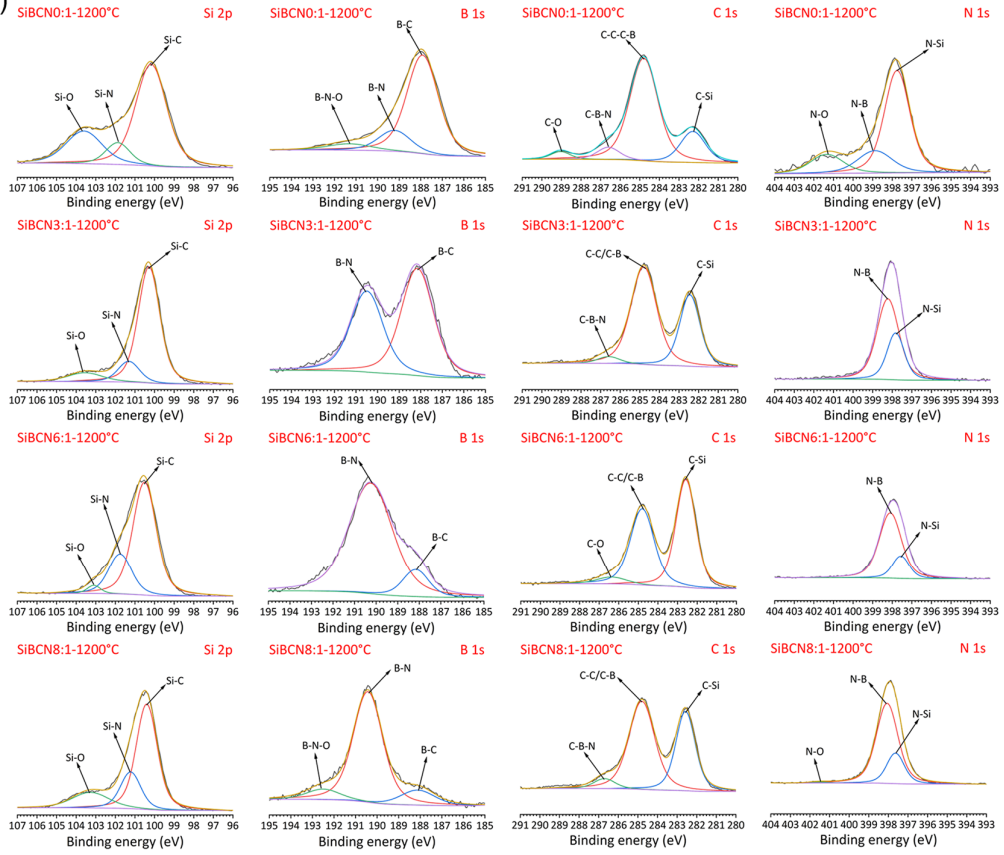

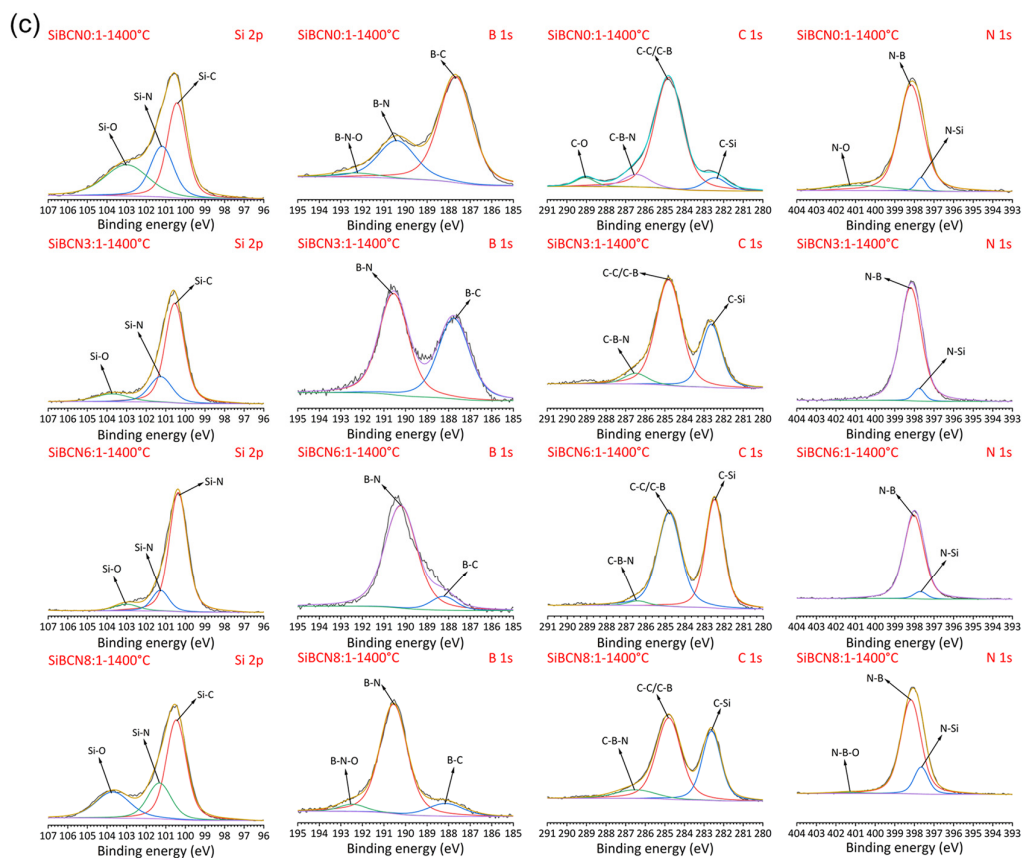

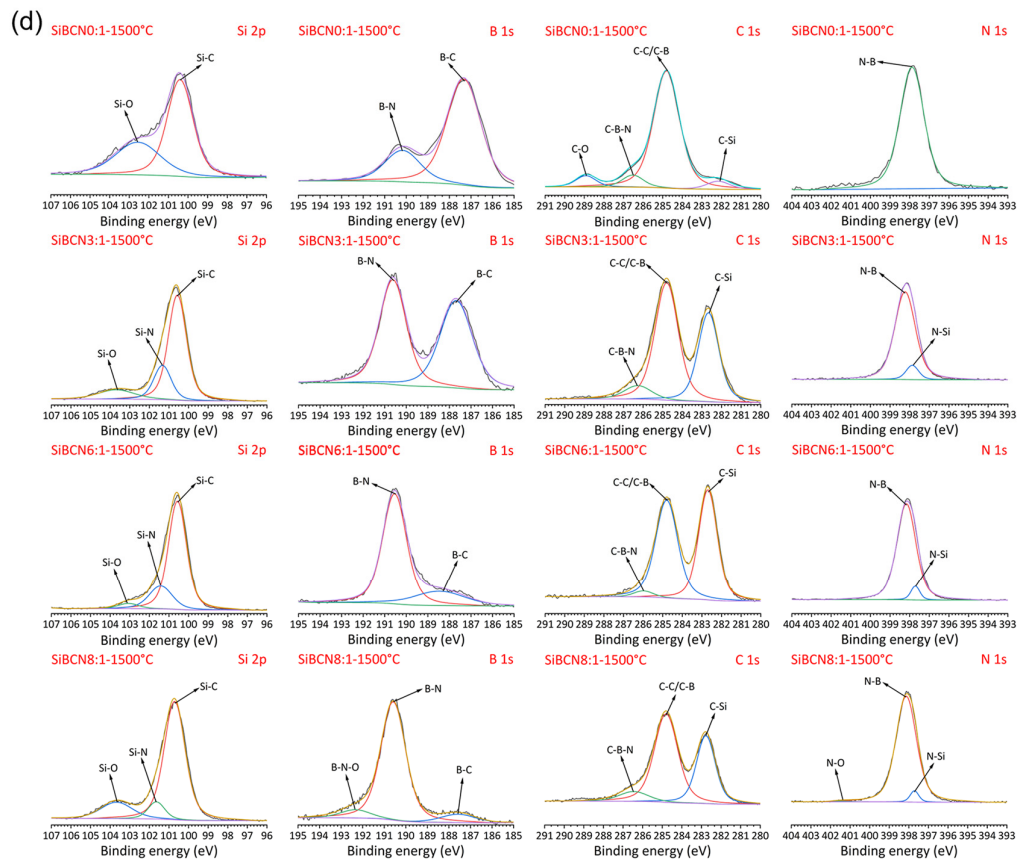

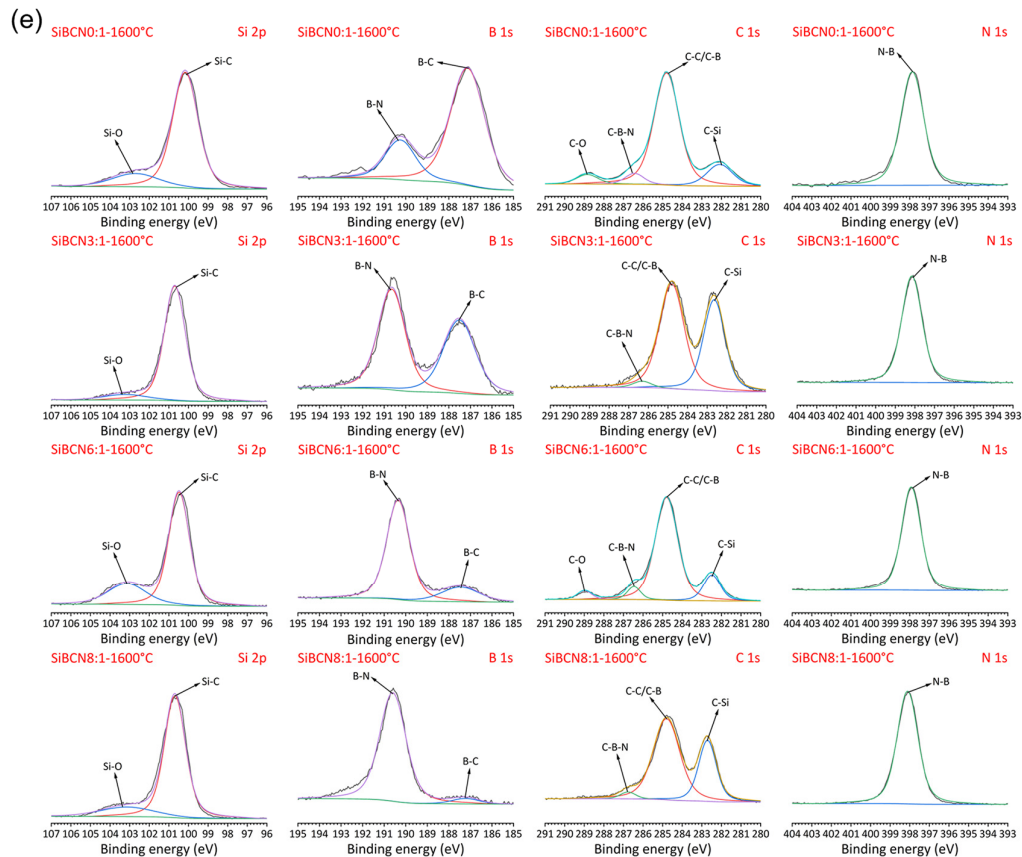

**Figure S2.** XPS spectra of SiBCN<sub>x:y</sub> pyrolyzed under Ar atmosphere at 1000 °C (a), 1200 °C (b), 1400 °C (c), 1500 °C (d), 1600 °C (e).

### 3. The surface topography of the ceramic bulk

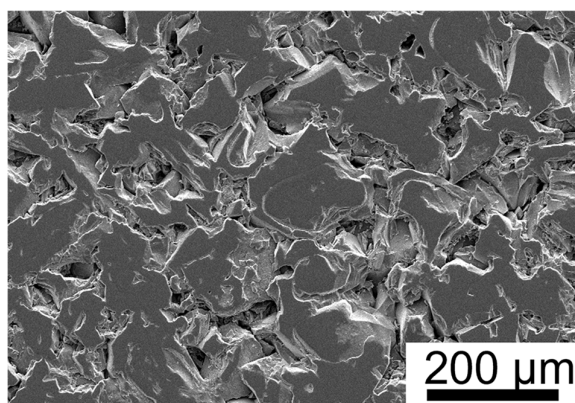

**Figure S3.** SEM image of the ceramic bulk.
